# Supplementary material
Source: bioRxiv or medRxiv preprint supplement (https://www.biorxiv.org/content/biorxiv/early/2021/09/27/2021.09.27.461965/DC1/embed/media-1.pdf)
Supplement: Supplementary file [file media-1.pdf]

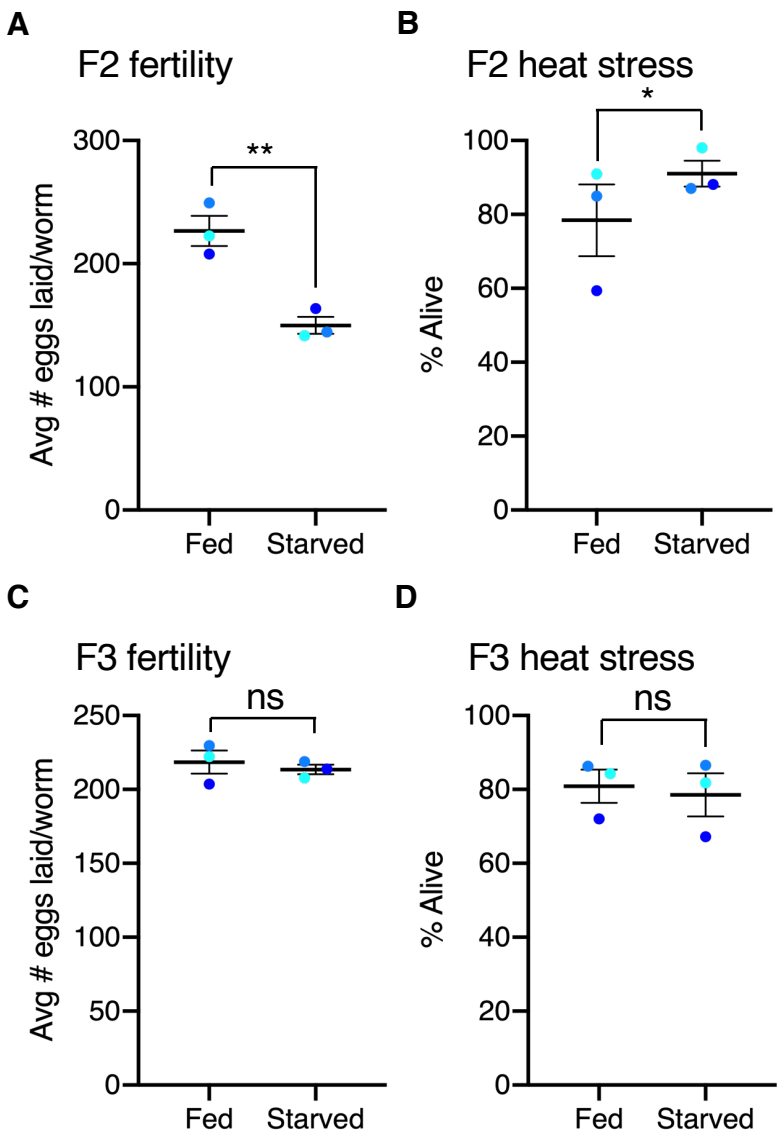

Fig. S1 Starvation induces transgenerational fertility and heat stress phenotypes that revert in the F3 generation

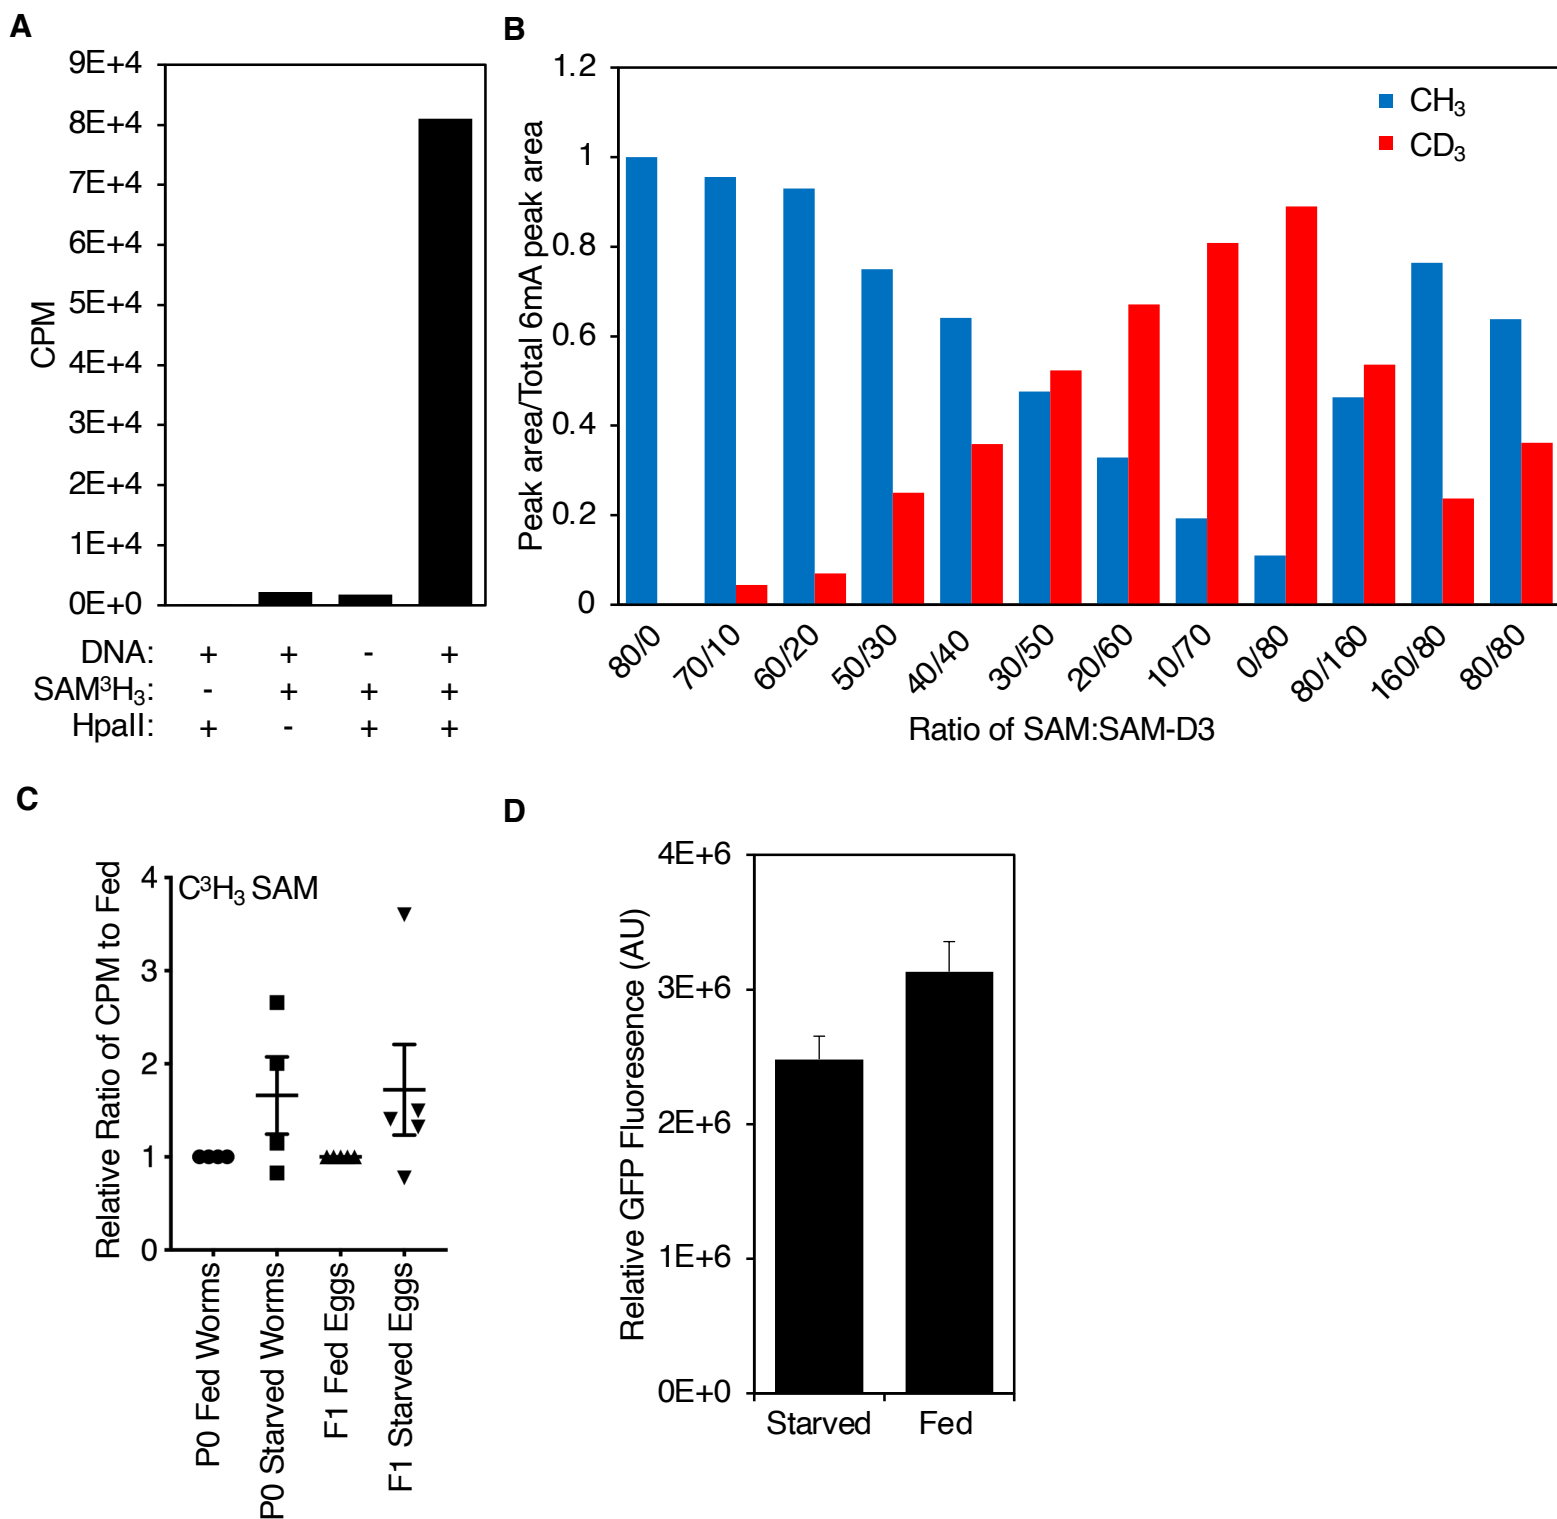

Fig. S2 Deuterated SAM can be utilized by enzymes with ~ equal activity and worms starved as L1s do not consume more food than fed worms at L3 stage

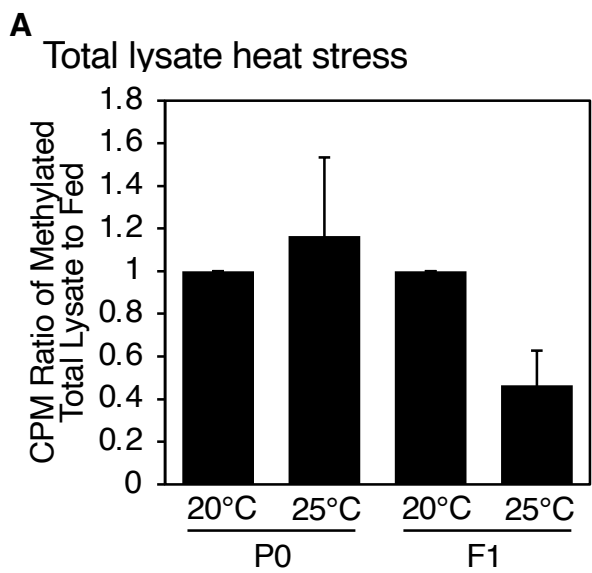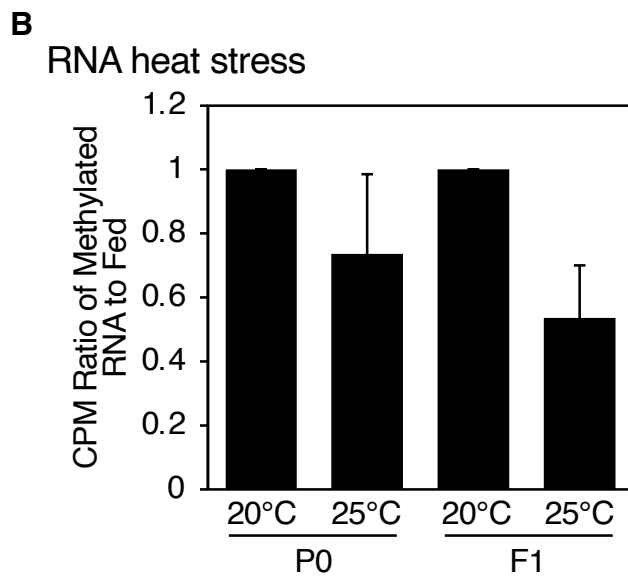

Fig. S3 Heat stress causes no consistent heritable change in methylation

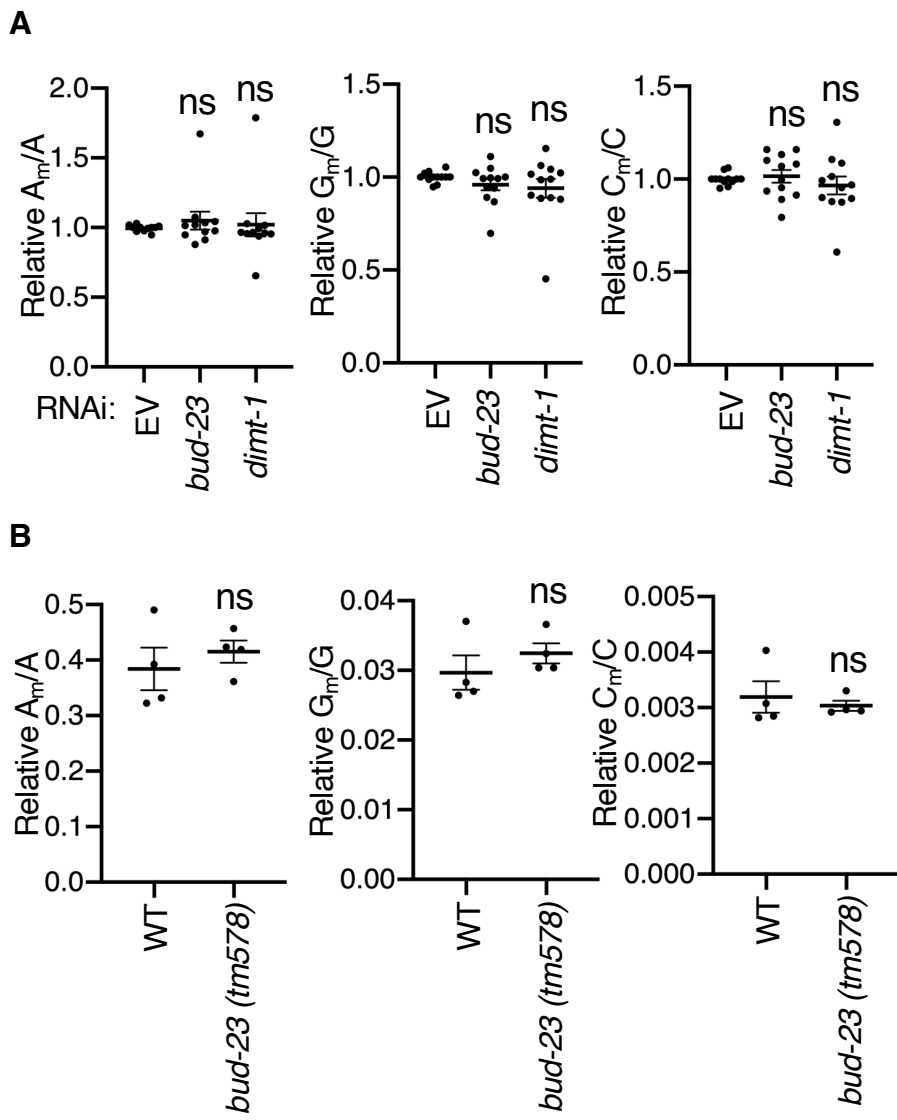

Fig. S4 *dimt-1* and *bud-23* deletion do not affect 2'O methylation modifications on the 18S rRNA

**A**

F1 Fed eggs

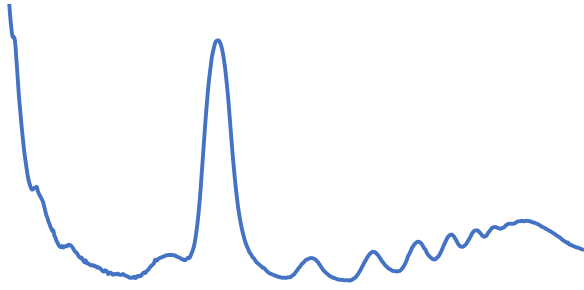

**B**

F1 starved eggs

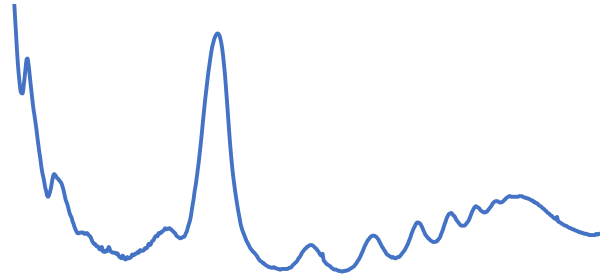

Fig. S5 F1 eggs from fed and starved parents have similar polysome profiles

A

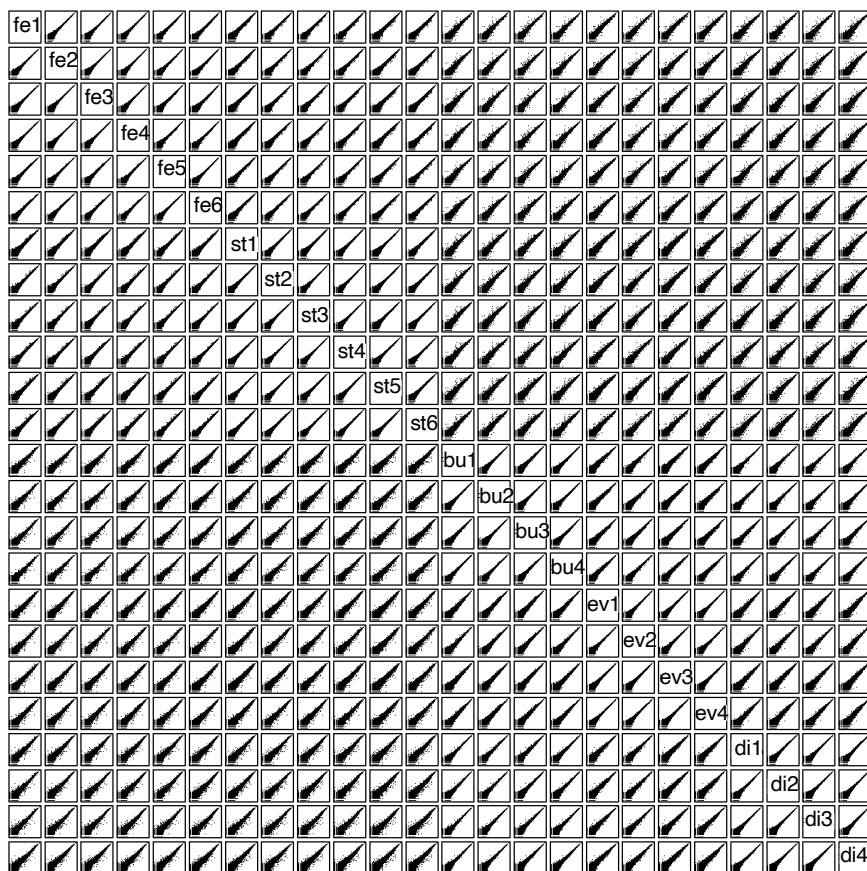

B

| GO Term mRNAseq KD <i>bud-23</i> or <i>dimt-1</i> | P value  |
|---------------------------------------------------|----------|
| Embryo development                                | 2.01E-24 |
| Reproduction                                      | 1.64E-18 |
| Nematode larval development                       | 5.05E-14 |
| mRNA splicing                                     | 1.38E-10 |
| Receptor-mediated endocytosis                     | 9.38E-10 |
| Structural constituent of ribosome                | 4.65E-9  |
| Translation                                       | 7.14E-8  |
| Apoptotic process                                 | 1.83E-5  |
| Ribosome                                          | 6.71E-5  |
| Regulation of meiotic nuclear division            | 3.59E-4  |
| Protein folding                                   | 4.00E-4  |
| Germ cell development                             | 2.13E-3  |
| Determination of adult lifespan                   | 6.65E-3  |
| Growth                                            | 2.43E-3  |
| Mitochondrial electron transport                  | 3.34E-2  |
| RNA processing                                    | 3.59E-2  |
| Cell cycle                                        | 3.84E-2  |
| Ribosome biogenesis                               | 3.91E-2  |
| Translation initiation                            | 3.91E-2  |

C

| GO Term mRNAseq F1 starved up      | P value |
|------------------------------------|---------|
| Ribosome                           | 3.77E-8 |
| Response to heat                   | 3.95E-7 |
| Structural constituent of ribosome | 7.26E-7 |
| Translation                        | 2.01E-5 |
| Innate immune response             | 2.51E-5 |
| ER unfolded protein response       | 4.82E-4 |
| Flavonoid glucuronidation          | 2.56E-2 |

D

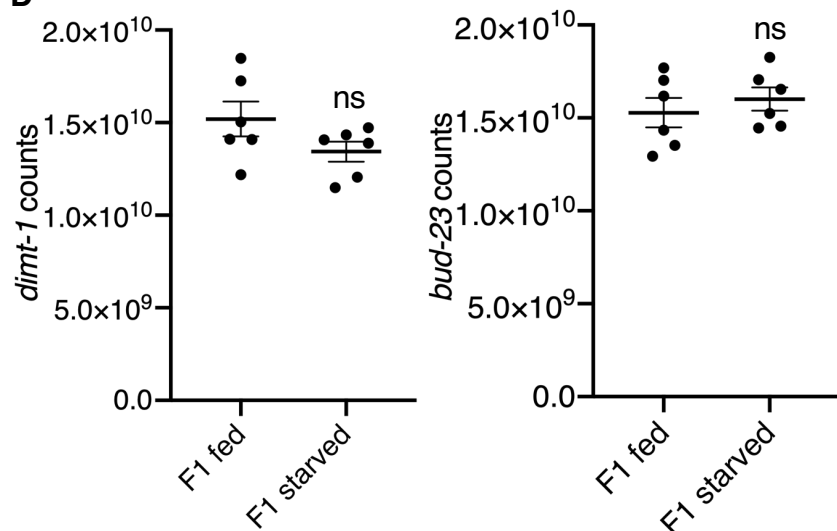

E

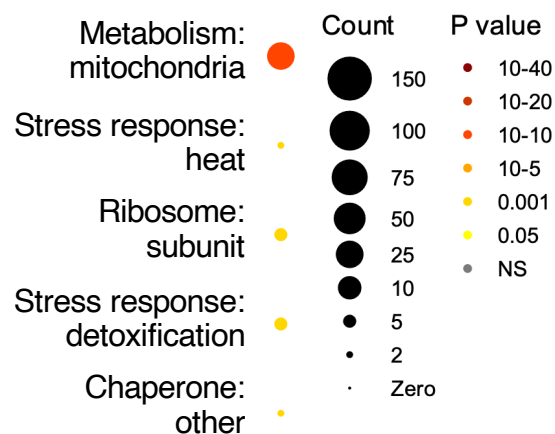

Fig. S6 Transcriptome Supplementary Analysis

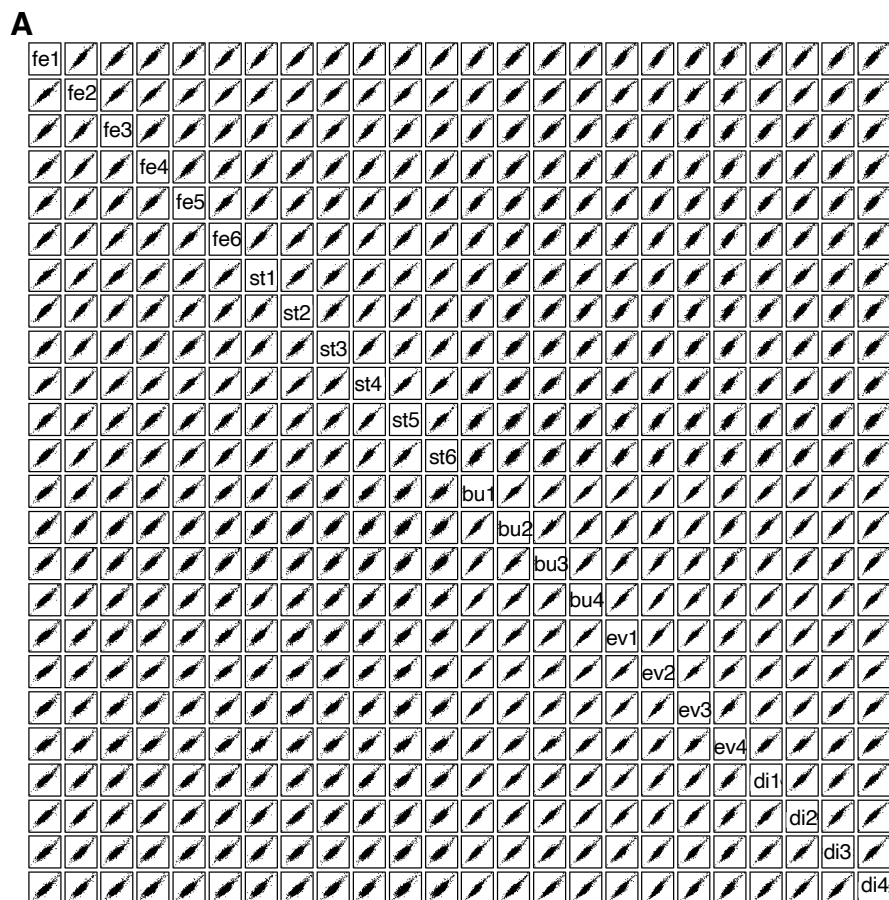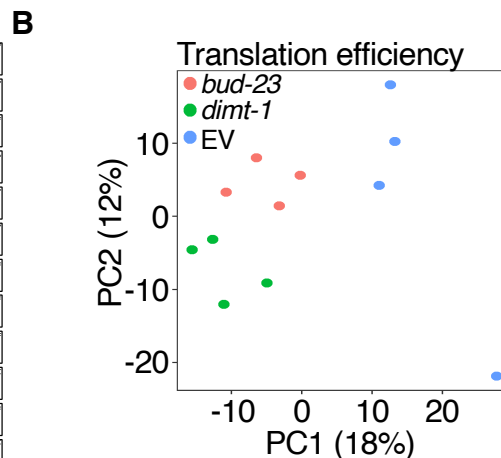

**C**

| GO Term TE <i>bud-23</i> KD                  | P value |
|----------------------------------------------|---------|
| Determination of adult lifespan              | 3.28E-4 |
| Regulation of multicellular growth           | 4.12E-3 |
| Nematode larval development                  | 4.95E-3 |
| Locomotion                                   | 6.39E-3 |
| Chemosensory behavior                        | 9.11E-3 |
| Positive regulation of gene expression       | 1.04E-2 |
| Signal transduction                          | 1.40E-2 |
| Embryo development                           | 2.11E-2 |
| Reproduction                                 | 2.90E-2 |
| Negative regulation of trans from RNA pol II | 3.74E-2 |
| Multicellular development                    | 5.06E-2 |

**D**

| GO Term TE <i>dimt-1</i> and <i>bud-23</i> KD | P value |
|-----------------------------------------------|---------|
| Determination of adult lifespan               | 1.53E-4 |
| Regulation of multicellular growth            | 3.54E-3 |
| Nematode larval development                   | 6.42E-3 |
| Chemosensory behavior                         | 7.83E-3 |
| Positive regulation of gene expression        | 8.95E-3 |
| Signal Transduction                           | 1.01E-2 |
| Embryo development                            | 4.51E-2 |
| Lipid storage                                 | 6.09E-2 |

**E**

| GO Term TE starved              | P value |
|---------------------------------|---------|
| Embryo development              | 3.28E-4 |
| Reproduction                    | 4.12E-3 |
| Nematode larval development     | 4.95E-3 |
| Gamete generation               | 6.39E-3 |
| Translation                     | 9.11E-3 |
| Determination of adult lifespan | 1.04E-2 |
| RNA interference                | 1.40E-2 |
| Apoptotic process               | 2.11E-2 |
| Ribosome biogenesis             | 2.90E-2 |
| Regulation of translation       | 3.74E-2 |
| P granule organization          | 5.06E-2 |

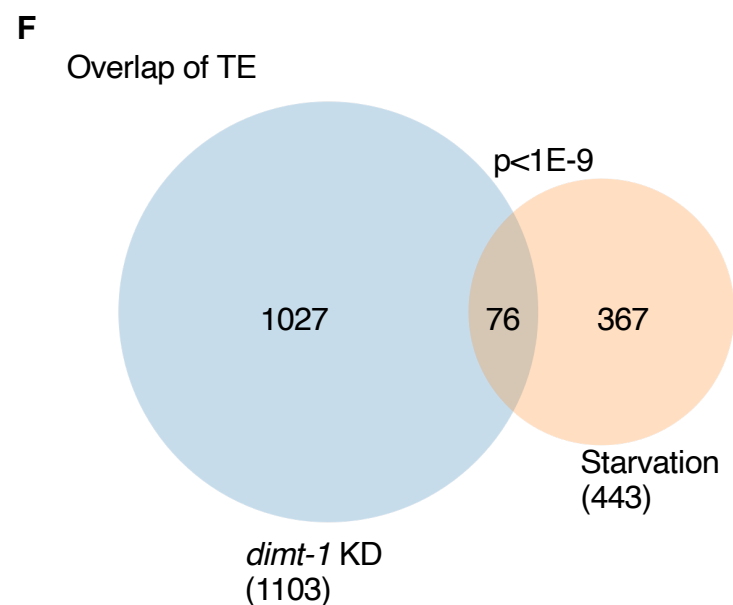

**G**

| GO Term TE KD <i>dimt-1</i> and starvation  | P value |
|---------------------------------------------|---------|
| Embryo development                          | 3.48E-5 |
| Nematode larval development                 | 1.77E-4 |
| Translation                                 | 4.90E-4 |
| Protein catabolic process                   | 1.58E-3 |
| Reproduction                                | 4.73E-3 |
| Receptor mediated endocytosis               | 5.69E-3 |
| Calcium ion transport                       | 9.30E-3 |
| tRNA aminoacylation for protein translation | 1.14E-2 |
| Determination of adult lifespan             | 3.60E-2 |
| Regulation of translation fidelity          | 4.25E-2 |
| Proteolysis                                 | 4.97E-2 |
| Growth                                      | 5.92E-2 |
| Secretion by cell                           | 6.53E-2 |
| Dopamine receptor signaling pathway         | 6.82E-2 |
| Cellular response to stress                 | 8.33E-2 |

Fig. S7 Translation Efficiency Supplementary Analysis

**A**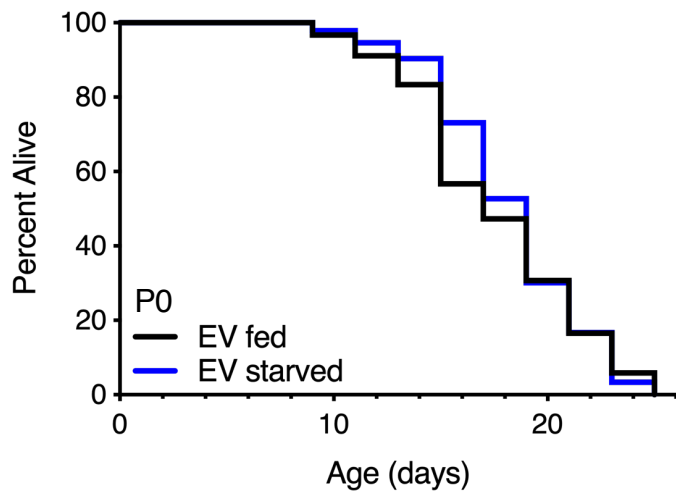**B**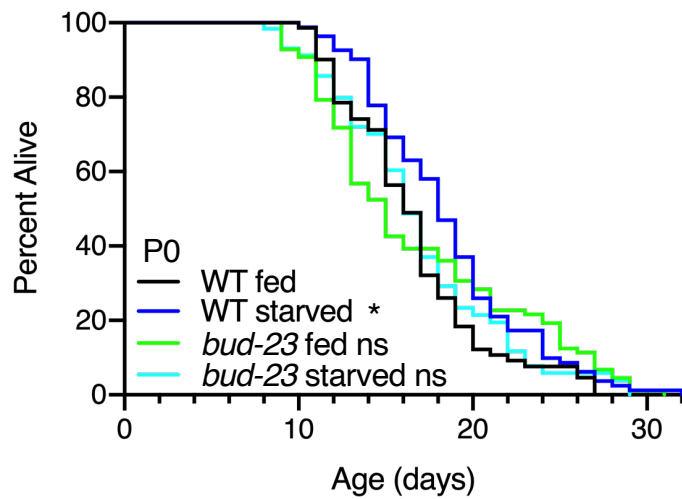

Fig. S8 *bud-23* is necessary for parental longevity extension in response to starvation



| Generation | Strain                        | Mean +/- SD | Median | p values | # worms | Figure |
|------------|-------------------------------|-------------|--------|----------|---------|--------|
| P0         | WT fed                        | 15.692      | 15     |          | 78/98   | 1c     |
| P0         | WT starved                    | 17.548      | 17     | 0.0009   | 73/94   | 1c     |
| F1         | WT fed                        | 15.951      | 17     |          | 82/96   | 1f     |
| F1         | WT starved                    | 17.416      | 17     | 0.0051   | 77/96   | 1f     |
| P0         | WT fed                        | 17.120      | 17     |          | 83/96   |        |
| P0         | WT starved                    | 20.358      | 19     | <0.0001  | 81/96   |        |
| F1         | WT fed                        | 16.816      | 17     |          | 87/96   |        |
| F1         | WT starved                    | 18.671      | 19     | 0.0463   | 81/96   |        |
| P0         | WT fed                        | 17.841      | 17     |          | 88/96   |        |
| P0         | WT starved                    | 19.543      | 19     | 0.0432   | 81/95   |        |
| F1         | WT fed                        | 17.706      | 19     |          | 86/96   |        |
| F1         | WT starved                    | 20.101      | 19     | 0.0030   | 89/96   |        |
| P0         | WT fed Empty vector           | 17.488      | 17     |          | 86/96   | S6a    |
| P0         | WT starved Empty vector       | 18.130      | 19     | 0.6368   | 92/96   | S6a    |
| P0         | WT fed Empty vector           | 19.132      | 19     |          | 91/96   |        |
| P0         | WT starved Empty vector       | 20.241      | 19     | 0.0350   | 87/96   |        |
| P0         | WT fed                        | 16.448      | 16     |          | 67/77   | S6b    |
| P0         | WT starved                    | 18.457      | 18     | 0.0120   | 81/84   | S6b    |
| P0         | <i>bud-23(tm5768)</i> fed     | 16.652      | 15     | 0.3866   | 92/98   | S6b    |
| P0         | <i>bud-23(tm5768)</i> starved | 16.315      | 16     | 0.7249   | 54/62   | S6b    |
| P0         | WT fed                        | 18.190      | 19     |          | 84/96   |        |
| P0         | WT starved                    | 19.597      | 19     | 0.0198   | 67/96   |        |
| P0         | <i>bud-23(tm5768)</i> fed     | 15.370      | 15     | 0.0742   | 54/71   |        |
| P0         | <i>bud-23(tm5768)</i> starved | 16.176      | 15     | 0.5224   | 68/96   |        |
| P0         | WT fed                        | 16.183      | 16     |          | 83/97   |        |
| P0         | WT starved                    | 17.405      | 18     | 0.0725   | 42/96   |        |
| P0         | <i>bud-23(tm5768)</i> fed     | 16.871      | 15     | 0.1077   | 85/96   |        |
| P0         | <i>bud-23(tm5768)</i> starved | 16.377      | 16     | 0.9069   | 53/96   |        |
| F1         | WT fed                        | 17.649      | 17     |          | 77/87   |        |
| F1         | WT starved                    | 19.557      | 19     | 0.0159   | 79/89   |        |
| F1         | <i>bud-23(tm5768)</i> fed     | 16.729      | 15     | 0.9979   | 59/93   |        |
| F1         | <i>bud-23(tm5768)</i> starved | 16.92       | 17     | 0.9201   | 50/90   |        |
| F1         | WT fed                        | 15.568      | 15     |          | 88/98   |        |
| F1         | WT starved                    | 17.169      | 17     | 0.0081   | 83/99   |        |
| F1         | <i>bud-23(tm5768)</i> fed     | 16.313      | 15     | 0.1350   | 67/97   |        |
| F1         | <i>bud-23(tm5768)</i> starved | 14.463      | 15     | 0.0425   | 67/94   |        |

**Supplementary Table 1. Parental starvation causes an increase in lifespan in the P0 and F1 generation in WT worms but not in *bud-23(tm5768)* mutant worms** The figure panels in which specific experiments are shown or used are indicated in the right column. The mean lifespan and SD values were calculated by Prism from triplicate samples of 30 worms each (90 worms total). # worms: number of observed dead worms at the end of the experiment/number of alive worms at the beginning of the experiment. The difference between both numbers corresponds to the number of censored worms (worms that underwent “matricide”, exhibited ruptured vulva, or crawled off the plates). P values are calculated by log rank (Mantel-Cox) statistical test.
